# Supplementary material for: A neural model of schemas and memory encoding
Source: Springer Nature journal article supplement (doi:10.1007/s00422-019-00808-7), 2019-11-04
Supplement: 422_2019_808_MOESM1_ESM.pdf [file 422_2019_808_MOESM1_ESM.pdf]

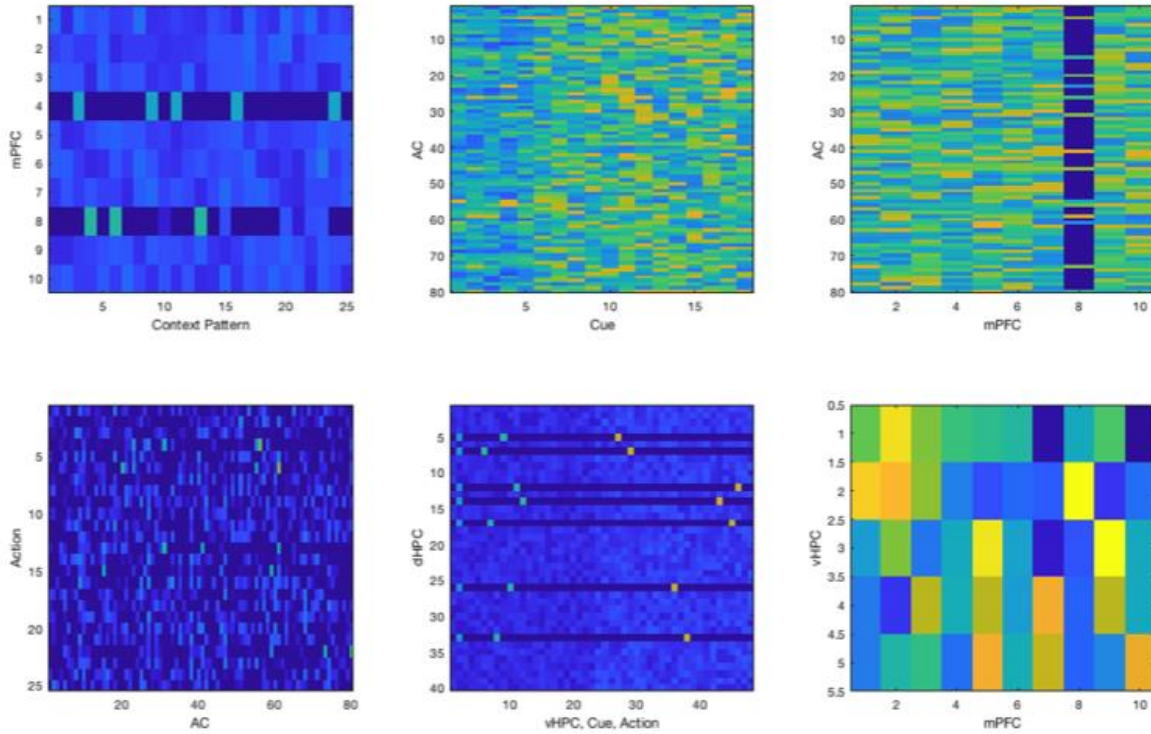

**Figure S1** Weights after the second experiment of Tse et al. for the HPC-lesioned condition. Weights from the context pattern to mPFC show that a second schema has been encoded. However, since vHPC and dHPC are lesioned, weights from the mPFC to AC do not show any sparse pattern of weights indicating a link between the mPFC neuron for the second schema, only the first. Additionally, weights to the dHPC only show triplets for the first schema, not the second. This indicates that no learning of the PAs in the second schema has occurred.
